# Supplementary material for: Root spatial metabolite profiling of two genotypes of barley (Hordeum vulgare L.) reveals differences in response to short-term salt stress
Source: PubMed Central journal article supplement (PMC4896359; doi:10.1093/jxb/erw059), 2016-03-05
Supplement: supp_erw059_supplementary_table_S1_S3.pdf [file supp_erw059_supplementary_table_S1_S3.pdf]

**Table S1:** Response ratios of metabolites in Region 2 and Region 3 compared to Region 1 in Clipper

| Metabolite                           | Region 1(CDZ) | Region 2 (EZ)      | Region 3 (MZ)       |
|--------------------------------------|---------------|--------------------|---------------------|
| <b><u>Amino acids and amines</u></b> |               |                    |                     |
| Alanine                              | 1.00 ± 0.09   | 1.05 ± 0.12        | <b>2.66 ± 0.12</b>  |
| Allantoin                            | 1.00 ± 0.16   | 1.55 ± 0.11        | 1.21 ± 0.11         |
| Arginine                             | 1.00 ± 0.05   | <b>1.52 ± 0.08</b> | <b>1.95 ± 0.14</b>  |
| Asparagine                           | 1.00 ± 0.35   | 1.41 ± 0.23        | 2.97 ± 0.09         |
| Aspartate                            | 1.00 ± 0.03   | <b>0.28 ± 0.18</b> | <b>0.12 ± 0.02</b>  |
| Butyric acid,4-amino (GABA)          | 1.00 ± 0.13   | <b>0.36 ± 0.16</b> | <b>0.18 ± 0.17</b>  |
| Cysteine                             | 1.00 ± 0.09   | 1.00 ± 0.10        | 0.74 ± 0.17         |
| Glutamate                            | 1.00 ± 0.04   | <b>0.42 ± 0.10</b> | <b>0.25 ± 0.05</b>  |
| Glutamine                            | 1.00 ± 0.04   | 1.47 ± 0.19        | <b>2.56 ± 0.20</b>  |
| Glycine                              | 1.00 ± 0.05   | 0.86 ± 0.16        | <b>1.56 ± 0.06</b>  |
| Guanine                              | 1.00 ± 0.35   | <b>0.18 ± 0.10</b> | <b>0.28 ± 0.21</b>  |
| Histidine                            | 1.00 ± 0.14   | <b>3.08 ± 0.16</b> | <b>2.97 ± 0.21</b>  |
| Homoserine                           | 1.00 ± 0.15   | 0.80 ± 0.08        | <b>0.44 ± 0.10</b>  |
| Isoleucine                           | 1.00 ± 0.07   | <b>3.30 ± 0.05</b> | <b>8.10 ± 0.04</b>  |
| Leucine                              | 1.00 ± 0.05   | <b>2.92 ± 0.05</b> | <b>5.99 ± 0.03</b>  |
| Methionine                           | 1.00 ± 0.08   | <b>1.50 ± 0.12</b> | <b>3.96 ± 0.07</b>  |
| N-acetyl serine                      | 1.00 ± 0.13   | 1.22 ± 0.18        | 1.79 ± 0.19         |
| Ornithine                            | 1.00 ± 0.14   | <b>1.57 ± 0.08</b> | <b>3.39 ± 0.12</b>  |
| Phenylalanine                        | 1.00 ± 0.08   | 1.24 ± 0.07        | <b>3.31 ± 0.07</b>  |
| Proline                              | 1.00 ± 0.12   | 1.29 ± 0.12        | <b>1.61 ± 0.05</b>  |
| Putrescine                           | 1.00 ± 0.21   | <b>9.18 ± 0.06</b> | <b>12.48 ± 0.11</b> |
| Pyroglutamate                        | 1.00 ± 0.03   | 0.93 ± 0.06        | <b>1.47 ± 0.07</b>  |
| Serine                               | 1.00 ± 0.06   | 0.88 ± 0.14        | 0.93 ± 0.04         |
| Threonine                            | 1.00 ± 0.34   | 0.94 ± 0.08        | 1.06 ± 0.16         |
| Tryptophan                           | 1.00 ± 0.15   | <b>3.50 ± 0.24</b> | <b>9.12 ± 0.16</b>  |
| Tyramine                             | 1.00 ± 0.15   | <b>5.86 ± 0.08</b> | <b>4.97 ± 0.06</b>  |
| Tyrosine                             | 1.00 ± 0.05   | 1.18 ± 0.07        | <b>4.63 ± 0.09</b>  |
| Valine                               | 1.00 ± 0.20   | <b>1.71 ± 0.06</b> | <b>3.25 ± 0.02</b>  |
| β Alanine                            | 1.00 ± 0.04   | 0.73 ± 0.15        | <b>0.57 ± 0.05</b>  |
| <b><u>Organic acids</u></b>          |               |                    |                     |
| alpha-Ketoglutarate                  | 1.00 ± 0.13   | 1.07 ± 0.14        | <b>0.37 ± 0.10</b>  |
| Citrate                              | 1.00 ± 0.14   | 0.77 ± 0.08        | <b>0.38 ± 0.14</b>  |
| Fumarate                             | 1.00 ± 0.09   | <b>0.47 ± 0.24</b> | <b>0.11 ± 0.19</b>  |
| Glucarate                            | 1.00 ± 0.20   | 0.60 ± 0.13        | 0.51 ± 0.22         |
| Gluconic acid                        | 1.00 ± 0.38   | <b>0.07 ± 0.10</b> | <b>0.04 ± 0.41</b>  |
| Glycerate                            | 1.00 ± 0.06   | <b>0.48 ± 0.06</b> | <b>0.46 ± 0.10</b>  |
| Glycolate                            | 1.00 ± 0.08   | <b>0.59 ± 0.30</b> | <b>0.61 ± 0.11</b>  |
| Malate                               | 1.00 ± 0.07   | 0.81 ± 0.12        | 0.86 ± 0.08         |
| Oxalate                              | 1.00 ± 0.17   | <b>0.48 ± 0.10</b> | <b>0.45 ± 0.27</b>  |
| Pipecolate                           | 1.00 ± 0.06   | <b>0.65 ± 0.15</b> | <b>0.59 ± 0.04</b>  |
| Quinate                              | 1.00 ± 0.25   | 0.77 ± 0.13        | <b>0.37 ± 0.20</b>  |
| Shikimate                            | 1.00 ± 0.22   | 1.51 ± 0.22        | 1.62 ± 0.15         |
| Succinate                            | 1.00 ± 0.07   | <b>0.32 ± 0.08</b> | <b>0.23 ± 0.05</b>  |
| Threonate                            | 1.00 ± 0.09   | 0.92 ± 0.25        | <b>0.42 ± 0.11</b>  |
| <b><u>Fatty Acids</u></b>            |               |                    |                     |
| Palmitic Acid (Hexadecanoate)        | 1.00 ± 0.08   | <b>0.32 ± 0.12</b> | <b>0.34 ± 0.11</b>  |
| Adipic Acid (Hexanedioic acid)       | 1.00 ± 0.06   | <b>0.42 ± 0.18</b> | <b>0.12 ± 0.21</b>  |
| Stearic Acid (Octadecanoate)         | 1.00 ± 0.17   | <b>0.22 ± 0.22</b> | <b>0.22 ± 0.12</b>  |
| Linoleic acid                        | 1.00 ± 0.30   | <b>0.22 ± 0.16</b> | <b>0.15 ± 0.30</b>  |
| Octadecanol                          | 1.00 ± 0.18   | <b>0.35 ± 0.22</b> | <b>0.29 ± 0.22</b>  |
| Oleic acid                           | 1.00 ± 0.18   | <b>0.39 ± 0.20</b> | <b>0.22 ± 0.35</b>  |

| <b>Sugars and Sugar Phosphates</b> |             |                     |                     |
|------------------------------------|-------------|---------------------|---------------------|
| Erythrose                          | 1.00 ± 0.21 | <b>4.28 ± 0.12</b>  | <b>2.77 ± 0.24</b>  |
| Fructose                           | 1.00 ± 0.12 | <b>27.70 ± 0.11</b> | <b>53.71 ± 0.09</b> |
| Fructose_6_Phosphate               | 1.00 ± 0.30 | 0.57 ± 0.12         | <b>0.27 ± 0.18</b>  |
| Galactinol                         | 1.00 ± 0.08 | 0.78 ± 0.08         | <b>0.22 ± 0.08</b>  |
| Galactonate                        | 1.00 ± 0.18 | <b>0.26 ± 0.33</b>  | <b>0.11 ± 0.09</b>  |
| Gluconate-6-phosphate              | 1.00 ± 0.31 | 0.42 ± 0.21         | 0.11 ± 0.17         |
| Glucose                            | 1.00 ± 0.13 | <b>9.73 ± 0.10</b>  | <b>23.46 ± 0.09</b> |
| Glucose-6-phosphate                | 1.00 ± 0.32 | 0.67 ± 0.09         | <b>0.35 ± 0.15</b>  |
| Glycerol                           | 1.00 ± 0.28 | 0.58 ± 0.12         | 0.63 ± 0.09         |
| Glycerol-3-phosphate               | 1.00 ± 0.15 | <b>0.23 ± 0.18</b>  | <b>0.08 ± 0.13</b>  |
| Glycerophosphoglycerol             | 1.00 ± 0.29 | <b>0.20 ± 0.38</b>  | <b>0.04 ± 0.09</b>  |
| Inositol                           | 1.00 ± 0.16 | 0.76 ± 0.12         | <b>0.48 ± 0.12</b>  |
| Inositol-1-phosphate               | 1.00 ± 0.23 | 0.64 ± 0.22         | <b>0.17 ± 0.13</b>  |
| Maltose                            | 1.00 ± 0.24 | <b>51.08 ± 0.57</b> | <b>28.71 ± 0.10</b> |
| Raffinose                          | 1.00 ± 0.04 | <b>2.45 ± 0.06</b>  | <b>0.69 ± 0.09</b>  |
| Ribonate                           | 1.00 ± 0.19 | 0.87 ± 0.32         | <b>0.16 ± 0.18</b>  |
| Sucrose                            | 1.00 ± 0.23 | <b>0.39 ± 0.12</b>  | <b>0.14 ± 0.19</b>  |
| Trehalose                          | 1.00 ± 0.20 | 0.88 ± 0.15         | <b>0.57 ± 0.08</b>  |
| Xylose                             | 1.00 ± 0.38 | 0.29 ± 0.33         | <b>0.24 ± 0.13</b>  |
| <b>Other compounds</b>             |             |                     |                     |
| Adenosine                          | 1.00 ± 0.29 | 1.06 ± 0.16         | 0.49 ± 0.35         |
| Campersterol                       | 1.00 ± 0.44 | 0.34 ± 0.15         | <b>0.10 ± 0.08</b>  |
| Ethanolamine                       | 1.00 ± 0.13 | <b>0.51 ± 0.15</b>  | <b>0.27 ± 0.08</b>  |
| Fucosterol                         | 1.00 ± 0.15 | 1.39 ± 0.32         | <b>0.31 ± 0.15</b>  |
| Indole-3-acetate (IAA)             | 1.00 ± 0.18 | 1.21 ± 0.25         | 2.02 ± 0.28         |
| Monomethylphosphate                | 1.00 ± 0.15 | <b>0.39 ± 0.15</b>  | <b>0.26 ± 0.39</b>  |
| Phosphate                          | 1.00 ± 0.08 | 1.10 ± 0.06         | <b>0.55 ± 0.08</b>  |
| Uracil                             | 1.00 ± 0.11 | <b>0.54 ± 0.16</b>  | <b>0.64 ± 0.11</b>  |
| <b>Unknowns</b>                    |             |                     |                     |
| Un_11.54_417                       | 1.00 ± 0.13 | <b>0.34 ± 0.14</b>  | <b>0.41 ± 0.17</b>  |
| Un_12.91_273                       | 1.00 ± 0.10 | <b>2.95 ± 0.22</b>  | <b>10.69 ± 0.08</b> |
| Un_13.96_284                       | 1.00 ± 0.15 | 0.69 ± 0.07         | 0.74 ± 0.04         |
| Un_14.37_158                       | 1.00 ± 0.12 | 0.64 ± 0.20         | <b>0.52 ± 0.18</b>  |
| Un_14.87_191                       | 1.00 ± 0.16 | <b>0.42 ± 0.08</b>  | <b>0.45 ± 0.16</b>  |
| Un_15.01_115                       | 1.00 ± 0.15 | 0.83 ± 0.07         | 1.28 ± 0.13         |
| Un_15.07_261                       | 1.00 ± 0.45 | 0.84 ± 0.17         | 0.86 ± 0.24         |
| Un_16.77_591                       | 1.00 ± 0.06 | 0.85 ± 0.15         | <b>0.53 ± 0.09</b>  |
| Un_17.26_102                       | 1.00 ± 0.20 | <b>3.15 ± 0.08</b>  | 1.49 ± 0.14         |
| Un_18.1_345                        | 1.00 ± 0.08 | <b>1.71 ± 0.13</b>  | <b>2.52 ± 0.05</b>  |
| Un_18.11_116                       | 1.00 ± 0.11 | <b>0.31 ± 0.33</b>  | <b>0.55 ± 0.15</b>  |
| Un_18.4_242                        | 1.00 ± 0.22 | <b>0.34 ± 0.11</b>  | <b>0.32 ± 0.16</b>  |
| Un_19.41_156                       | 1.00 ± 0.09 | 1.22 ± 0.10         | <b>1.76 ± 0.14</b>  |
| Un_22.25_217                       | 1.00 ± 0.48 | 1.99 ± 0.05         | <b>4.12 ± 0.09</b>  |
| Un_25.61_379                       | 1.00 ± 0.03 | <b>2.37 ± 0.15</b>  | <b>2.70 ± 0.21</b>  |
| Un_26.96_433                       | 1.00 ± 0.10 | <b>3.50 ± 0.12</b>  | <b>5.72 ± 0.23</b>  |
| Un_27.2_217                        | 1.00 ± 0.11 | <b>0.52 ± 0.22</b>  | <b>0.16 ± 0.09</b>  |
| Un_28.39_446                       | 1.00 ± 0.17 | <b>4.82 ± 0.18</b>  | <b>13.84 ± 0.22</b> |
| Un_28.68_446                       | 1.00 ± 0.17 | <b>4.94 ± 0.16</b>  | <b>11.32 ± 0.18</b> |
| Un_30.54_217                       | 1.00 ± 0.20 | <b>12.15 ± 0.18</b> | <b>12.46 ± 0.09</b> |
| Un_30.72_217                       | 1.00 ± 0.20 | <b>12.84 ± 0.21</b> | <b>11.97 ± 0.08</b> |
| Un_33.11_433                       | 1.00 ± 0.26 | <b>0.47 ± 0.21</b>  | <b>0.11 ± 0.10</b>  |

Data represents mean of 5 representatives of 10-pooled samples +/- s.e. Values that are highlighted in green (and bold) have a *t*-Test value  $P < 0.05$  / (number of metabolites) while those with cyan (and bold) highlight are between this *P* value and 0.05 (i.e. below 0.05, but not below the Bonferroni-corrected *P* value).

**Table S2:** Response ratios of metabolites in Region 2 and Region 3 of Sahara compared to Region 1.

| Metabolite                           | Region 1(CDZ) | Region 2 (EZ)       | Region 3 (MZ)       |
|--------------------------------------|---------------|---------------------|---------------------|
| <b><u>Amino acids and amines</u></b> |               |                     |                     |
| Alanine                              | 1.00 ± 0.10   | 0.82 ± 0.05         | 1.37 ± 0.11         |
| Allantoin                            | 1.00 ± 0.16   | <b>2.93 ± 0.20</b>  | <b>1.89 ± 0.04</b>  |
| Arginine                             | 1.00 ± 0.06   | <b>2.46 ± 0.08</b>  | <b>2.72 ± 0.11</b>  |
| Asparagine                           | 1.00 ± 0.05   | <b>2.34 ± 0.12</b>  | <b>4.00 ± 0.06</b>  |
| Aspartate                            | 1.00 ± 0.20   | <b>0.40 ± 0.10</b>  | <b>0.11 ± 0.04</b>  |
| Butyric acid,4-amino (GABA)          | 1.00 ± 0.11   | <b>0.34 ± 0.09</b>  | <b>0.09 ± 0.30</b>  |
| Cysteine                             | 1.00 ± 0.03   | <b>1.85 ± 0.14</b>  | 0.94 ± 0.15         |
| Glutamate                            | 1.00 ± 0.08   | <b>0.66 ± 0.12</b>  | <b>0.28 ± 0.09</b>  |
| Ethanolamine                         | 1.00 ± 0.07   | 0.89 ± 0.05         | <b>0.36 ± 0.07</b>  |
| Glutamine                            | 1.00 ± 0.16   | <b>2.46 ± 0.15</b>  | <b>2.65 ± 0.15</b>  |
| Glycine                              | 1.00 ± 0.05   | 1.18 ± 0.07         | 0.95 ± 0.10         |
| Guanine                              | 1.00 ± 0.22   | <b>0.35 ± 0.22</b>  | <b>0.32 ± 0.21</b>  |
| Histidine                            | 1.00 ± 0.29   | <b>6.62 ± 0.11</b>  | <b>4.39 ± 0.11</b>  |
| Homoserine                           | 1.00 ± 0.14   | 1.17 ± 0.10         | <b>0.57 ± 0.14</b>  |
| Isoleucine                           | 1.00 ± 0.10   | <b>2.33 ± 0.04</b>  | <b>6.57 ± 0.03</b>  |
| Leucine                              | 1.00 ± 0.07   | <b>2.40 ± 0.05</b>  | <b>5.64 ± 0.02</b>  |
| Methionine                           | 1.00 ± 0.12   | <b>2.78 ± 0.09</b>  | <b>5.17 ± 0.01</b>  |
| N-acetyl serine                      | 1.00 ± 0.25   | <b>2.83 ± 0.15</b>  | <b>3.12 ± 0.16</b>  |
| Ornithine                            | 1.00 ± 0.14   | <b>2.16 ± 0.13</b>  | <b>4.53 ± 0.19</b>  |
| Phenylalanine                        | 1.00 ± 0.08   | <b>1.90 ± 0.14</b>  | <b>5.30 ± 0.03</b>  |
| Proline                              | 1.00 ± 0.12   | 1.29 ± 0.11         | <b>1.50 ± 0.02</b>  |
| Putrescine                           | 1.00 ± 0.27   | <b>25.47 ± 0.16</b> | <b>31.37 ± 0.15</b> |
| Pyroglutamate                        | 1.00 ± 0.14   | <b>1.71 ± 0.14</b>  | <b>1.64 ± 0.12</b>  |
| Serine                               | 1.00 ± 0.08   | <b>1.87 ± 0.13</b>  | <b>1.38 ± 0.04</b>  |
| Threonine                            | 1.00 ± 0.16   | <b>2.89 ± 0.06</b>  | <b>2.23 ± 0.11</b>  |
| Tryptophan                           | 1.00 ± 0.65   | <b>16.76 ± 0.11</b> | <b>46.88 ± 0.09</b> |
| Tyramine                             | 1.00 ± 0.32   | <b>16.12 ± 0.13</b> | <b>14.41 ± 0.09</b> |
| Tyrosine                             | 1.00 ± 0.09   | <b>1.89 ± 0.13</b>  | <b>5.64 ± 0.03</b>  |
| Valine                               | 1.00 ± 0.11   | <b>1.70 ± 0.11</b>  | <b>2.76 ± 0.02</b>  |
| β Alanine                            | 1.00 ± 0.24   | 0.80 ± 0.20         | <b>0.30 ± 0.07</b>  |
| <b><u>Organic acids</u></b>          |               |                     |                     |
| alpha-Ketoglutarate                  | 1.00 ± 0.29   | 1.84 ± 0.13         | 0.46 ± 0.26         |
| Citrate                              | 1.00 ± 0.09   | 1.19 ± 0.29         | <b>0.64 ± 0.16</b>  |
| Fumarate                             | 1.00 ± 0.04   | 0.88 ± 0.17         | <b>0.17 ± 0.14</b>  |
| Glucarate                            | 1.00 ± 0.30   | 1.26 ± 0.25         | 1.28 ± 0.16         |
| Gluconic acid                        | 1.00 ± 0.34   | 1.08 ± 0.25         | <b>0.22 ± 0.25</b>  |
| Glycerate                            | 1.00 ± 0.05   | 0.88 ± 0.18         | <b>0.54 ± 0.18</b>  |
| Glycolate                            | 1.00 ± 0.10   | 1.07 ± 0.52         | <b>0.44 ± 0.09</b>  |
| Malate                               | 1.00 ± 0.02   | 1.63 ± 0.17         | 1.03 ± 0.10         |
| Oxalate                              | 1.00 ± 0.05   | <b>0.45 ± 0.13</b>  | <b>0.40 ± 0.08</b>  |
| Pipecolate                           | 1.00 ± 0.11   | 0.94 ± 0.08         | <b>0.64 ± 0.10</b>  |
| Quinate                              | 1.00 ± 0.10   | <b>2.26 ± 0.13</b>  | 0.51 ± 0.33         |
| Shikimate                            | 1.00 ± 0.44   | <b>22.81 ± 0.45</b> | <b>4.33 ± 0.43</b>  |
| Succinate                            | 1.00 ± 0.07   | <b>0.57 ± 0.07</b>  | <b>0.30 ± 0.10</b>  |
| Threonate                            | 1.00 ± 0.18   | 1.43 ± 0.08         | 0.68 ± 0.20         |
| <b><u>Fatty Acids</u></b>            |               |                     |                     |
| Palmitic Acid (Hexadecanoate)        | 1.00 ± 0.15   | 0.58 ± 0.27         | <b>0.34 ± 0.11</b>  |
| Adipic Acid (Hexanedioic acid)       | 1.00 ± 0.06   | <b>0.50 ± 0.27</b>  | <b>0.14 ± 0.06</b>  |
| Stearic Acid (Octadecanoate)         | 1.00 ± 0.18   | <b>0.33 ± 0.12</b>  | <b>0.26 ± 0.12</b>  |
| Linoleic acid                        | 1.00 ± 0.19   | <b>0.24 ± 0.39</b>  | <b>0.22 ± 0.26</b>  |
| Octadecanol                          | 1.00 ± 0.08   | <b>0.29 ± 0.28</b>  | <b>0.31 ± 0.11</b>  |
| Oleic acid                           | 1.00 ± 0.20   | <b>0.47 ± 0.11</b>  | 0.32 ± 0.38         |

| <b>Sugars and Sugar Phosphates</b> |             |                     |                     |
|------------------------------------|-------------|---------------------|---------------------|
| Erythrose                          | 1.00 ± 0.15 | <b>7.83 ± 0.14</b>  | <b>5.78 ± 0.26</b>  |
| Fructose                           | 1.00 ± 0.26 | <b>32.83 ± 0.33</b> | <b>73.93 ± 0.14</b> |
| Fructose_6_Phosphate               | 1.00 ± 0.14 | 1.45 ± 0.31         | 0.88 ± 0.11         |
| Galactinol                         | 1.00 ± 0.18 | 1.07 ± 0.02         | <b>0.25 ± 0.14</b>  |
| Galactonate                        | 1.00 ± 0.10 | 1.05 ± 0.20         | <b>0.30 ± 0.10</b>  |
| Gluconate-6-phosphate              | 1.00 ± 0.14 | <b>0.35 ± 0.20</b>  | <b>0.13 ± 0.18</b>  |
| Glucose                            | 1.00 ± 0.13 | <b>20.31 ± 0.55</b> | <b>43.97 ± 0.15</b> |
| Glucose-6-phosphate                | 1.00 ± 0.12 | 1.52 ± 0.29         | 1.02 ± 0.13         |
| Glycerol                           | 1.00 ± 0.16 | <b>2.41 ± 0.26</b>  | 1.29 ± 0.07         |
| Glycerol-3-phosphate               | 1.00 ± 0.09 | <b>0.35 ± 0.14</b>  | <b>0.11 ± 0.15</b>  |
| Glycerophosphoglycerol             | 1.00 ± 0.03 | <b>0.32 ± 0.18</b>  | <b>0.07 ± 0.21</b>  |
| Inositol                           | 1.00 ± 0.11 | 6.57 ± 0.79         | 0.87 ± 0.11         |
| Inositol-1-phosphate               | 1.00 ± 0.06 | 0.84 ± 0.26         | <b>0.34 ± 0.04</b>  |
| Maltose                            | 1.00 ± 0.22 | <b>12.13 ± 0.45</b> | <b>20.11 ± 0.07</b> |
| Raffinose                          | 1.00 ± 0.22 | <b>19.88 ± 0.55</b> | <b>2.60 ± 0.09</b>  |
| Ribonate                           | 1.00 ± 0.80 | <b>2.55 ± 0.13</b>  | 0.68 ± 0.08         |
| Sucrose                            | 1.00 ± 0.10 | 0.85 ± 0.10         | <b>0.31 ± 0.11</b>  |
| Trehalose                          | 1.00 ± 0.06 | 1.51 ± 0.18         | 0.86 ± 0.08         |
| Xylose                             | 1.00 ± 0.29 | <b>9.18 ± 0.10</b>  | <b>8.67 ± 0.27</b>  |
| <b>Other compounds</b>             |             |                     |                     |
| Adenosine                          | 1.00 ± 0.16 | 1.22 ± 0.28         | 0.63 ± 0.11         |
| Campersterol                       | 1.00 ± 0.12 | <b>0.67 ± 0.09</b>  | <b>0.18 ± 0.15</b>  |
| Fucosterol                         | 1.00 ± 0.07 | <b>1.19 ± 0.12</b>  | <b>0.67 ± 0.04</b>  |
| Indole-3-acetate (IAA)             | 1.00 ± 0.37 | 2.65 ± 0.22         | 2.47 ± 0.24         |
| Monomethylphosphate                | 1.00 ± 0.30 | 0.43 ± 0.19         | <b>0.30 ± 0.13</b>  |
| Phosphate                          | 1.00 ± 0.12 | <b>1.94 ± 0.06</b>  | <b>0.67 ± 0.04</b>  |
| Uracil                             | 1.00 ± 0.08 | <b>0.44 ± 0.17</b>  | <b>0.45 ± 0.15</b>  |
| <b>Unknowns</b>                    |             |                     |                     |
| Un_11.54_417                       | 1.00 ± 0.20 | 1.72 ± 0.75         | <b>0.41 ± 0.22</b>  |
| Un_12.91_273                       | 1.00 ± 0.22 | <b>2.52 ± 0.19</b>  | <b>8.52 ± 0.44</b>  |
| Un_13.96_284                       | 1.00 ± 0.13 | 1.29 ± 0.12         | 1.11 ± 0.14         |
| Un_14.37_158                       | 1.00 ± 0.13 | 1.43 ± 0.14         | 0.93 ± 0.08         |
| Un_14.87_191                       | 1.00 ± 0.19 | <b>0.41 ± 0.10</b>  | <b>0.38 ± 0.10</b>  |
| Un_15.01_115                       | 1.00 ± 0.11 | <b>1.71 ± 0.09</b>  | <b>1.77 ± 0.13</b>  |
| Un_15.07_261                       | 1.00 ± 0.24 | <b>2.84 ± 0.21</b>  | 2.10 ± 0.37         |
| Un_16.77_591                       | 1.00 ± 0.08 | 1.41 ± 0.20         | 0.68 ± 0.16         |
| Un_17.26_102                       | 1.00 ± 0.52 | <b>14.34 ± 0.10</b> | <b>7.40 ± 0.21</b>  |
| Un_18.1_345                        | 1.00 ± 0.08 | <b>2.86 ± 0.09</b>  | <b>3.11 ± 0.07</b>  |
| Un_18.11_116                       | 1.00 ± 0.27 | 1.44 ± 0.30         | <b>1.61 ± 0.11</b>  |
| Un_18.4_242                        | 1.00 ± 0.17 | <b>0.52 ± 0.15</b>  | <b>0.41 ± 0.07</b>  |
| Un_19.41_156                       | 1.00 ± 0.17 | <b>2.59 ± 0.17</b>  | <b>2.47 ± 0.15</b>  |
| Un_22.25_217                       | 1.00 ± 0.19 | <b>6.52 ± 0.47</b>  | <b>9.41 ± 0.10</b>  |
| Un_25.61_379                       | 1.00 ± 0.17 | <b>3.41 ± 0.20</b>  | <b>5.06 ± 0.11</b>  |
| Un_26.96_433                       | 1.00 ± 0.14 | <b>4.25 ± 0.15</b>  | <b>7.59 ± 0.14</b>  |
| Un_27.2_217                        | 1.00 ± 0.13 | 0.70 ± 0.21         | <b>0.29 ± 0.05</b>  |
| Un_28.39_446                       | 1.00 ± 0.31 | <b>5.78 ± 0.18</b>  | <b>15.86 ± 0.16</b> |
| Un_28.68_446                       | 1.00 ± 0.31 | <b>5.54 ± 0.16</b>  | <b>12.42 ± 0.13</b> |
| Un_30.54_217                       | 1.00 ± 0.29 | <b>11.51 ± 0.34</b> | <b>26.22 ± 0.06</b> |
| Un_30.72_217                       | 1.00 ± 0.29 | <b>11.70 ± 0.34</b> | <b>25.98 ± 0.06</b> |
| Un_33.11_433                       | 1.00 ± 0.07 | 0.79 ± 0.16         | <b>0.19 ± 0.14</b>  |

Data represents mean of 5 representatives of 10-pooled samples +/- s.e. Values that are highlighted in green (and bold) have a *t*-Test value  $P < 0.05$  / (number of metabolites) while those with cyan (and bold) highlight are between this  $P$  value and 0.05 (i.e. below 0.05, but not below the Bonferroni-corrected  $P$  value).

**Table S3:** Response ratios of metabolites in root zones of Clipper and Sahara subjected to 100 mM salt-stress.

| Metabolite                    | Region 1(CDZ)      |                    | Region 2 (EZ)      |                    | Region 3 (MZ)      |                    |
|-------------------------------|--------------------|--------------------|--------------------|--------------------|--------------------|--------------------|
|                               | Clipper            | Sahara             | Clipper            | Sahara             | Clipper            | Sahara             |
| <b>Amino acids and amines</b> |                    |                    |                    |                    |                    |                    |
| Alanine                       | <b>1.83 ± 0.05</b> | 1.05 ± 0.04        | <b>1.83 ± 0.09</b> | <b>1.28 ± 0.05</b> | <b>1.56 ± 0.09</b> | <b>1.40 ± 0.08</b> |
| Allantoin                     | 1.24 ± 0.10        | 1.20 ± 0.12        | <b>1.40 ± 0.06</b> | 0.85 ± 0.10        | <b>1.89 ± 0.12</b> | <b>2.07 ± 0.12</b> |
| Arginine                      | 1.47 ± 0.13        | 0.69 ± 0.17        | <b>1.76 ± 0.08</b> | 1.13 ± 0.15        | <b>2.87 ± 0.23</b> | <b>1.62 ± 0.07</b> |
| Asparagine                    | <b>3.84 ± 0.12</b> | 0.93 ± 0.20        | 2.78 ± 0.23        | 0.94 ± 0.14        | <b>3.45 ± 0.24</b> | 1.17 ± 0.07        |
| Aspartate                     | <b>1.31 ± 0.06</b> | 1.09 ± 0.06        | 1.58 ± 0.08        | 1.19 ± 0.08        | <b>1.41 ± 0.05</b> | <b>1.27 ± 0.06</b> |
| Butyric acid,4-amino (GABA)   | 1.89 ± 0.27        | 0.83 ± 0.18        | 1.65 ± 0.16        | 1.34 ± 0.17        | 1.26 ± 0.14        | 0.94 ± 0.09        |
| Cysteine                      | 1.08 ± 0.15        | 0.85 ± 0.12        | <b>1.60 ± 0.13</b> | 0.75 ± 0.10        | 2.43 ± 0.34        | 1.08 ± 0.04        |
| Glutamate                     | 1.09 ± 0.04        | 1.02 ± 0.07        | <b>1.42 ± 0.09</b> | 1.20 ± 0.09        | <b>1.48 ± 0.05</b> | <b>1.47 ± 0.08</b> |
| Glutamine                     | <b>1.72 ± 0.12</b> | 0.87 ± 0.13        | 1.40 ± 0.21        | 0.71 ± 0.14        | 1.30 ± 0.13        | 1.36 ± 0.19        |
| Glycine                       | 1.15 ± 0.03        | <b>0.81 ± 0.07</b> | 1.36 ± 0.05        | 0.89 ± 0.05        | 1.09 ± 0.07        | 1.22 ± 0.03        |
| Guanine                       | <b>0.35 ± 0.05</b> | 1.63 ± 0.26        | 1.39 ± 0.11        | 0.57 ± 0.10        | 1.00 ± 0.12        | 1.15 ± 0.23        |
| Histidine                     | <b>1.82 ± 0.13</b> | 0.78 ± 0.45        | 1.24 ± 0.09        | 0.85 ± 0.13        | 1.62 ± 0.17        | 1.26 ± 0.06        |
| Homoserine                    | 1.12 ± 0.17        | 0.87 ± 0.19        | 1.18 ± 0.08        | 1.18 ± 0.05        | <b>1.79 ± 0.07</b> | 1.22 ± 0.10        |
| Isoleucine                    | 1.31 ± 0.03        | 0.90 ± 0.11        | 1.18 ± 0.07        | 0.97 ± 0.06        | <b>1.18 ± 0.05</b> | 1.05 ± 0.03        |
| Leucine                       | 1.24 ± 0.02        | 0.81 ± 0.10        | 1.16 ± 0.06        | 1.03 ± 0.05        | 1.07 ± 0.04        | 1.07 ± 0.03        |
| Methionine                    | 0.98 ± 0.05        | 1.16 ± 0.29        | 1.16 ± 0.09        | <b>0.66 ± 0.08</b> | 0.92 ± 0.06        | 1.02 ± 0.02        |
| N-acetyl serine               | 1.46 ± 0.11        | 1.37 ± 0.13        | 1.45 ± 0.13        | 0.23 ± 0.15        | 1.65 ± 0.14        | 1.30 ± 0.23        |
| Ornithine                     | 1.69 ± 0.24        | 0.92 ± 0.19        | <b>1.62 ± 0.10</b> | 1.18 ± 0.12        | <b>2.67 ± 0.16</b> | <b>1.71 ± 0.07</b> |
| Phenylalanine                 | 1.02 ± 0.04        | 1.15 ± 0.14        | 1.08 ± 0.10        | 0.76 ± 0.07        | 0.99 ± 0.05        | <b>0.83 ± 0.05</b> |
| Proline                       | <b>5.67 ± 0.04</b> | <b>5.35 ± 0.09</b> | <b>2.25 ± 0.07</b> | <b>2.27 ± 0.05</b> | <b>1.69 ± 0.06</b> | <b>1.55 ± 0.06</b> |
| Putrescine                    | 1.35 ± 0.34        | 0.94 ± 0.13        | <b>0.64 ± 0.09</b> | <b>0.47 ± 0.18</b> | 0.70 ± 0.26        | 0.75 ± 0.07        |
| Pyroglutamate                 | <b>1.27 ± 0.04</b> | 0.92 ± 0.08        | <b>1.33 ± 0.06</b> | 0.87 ± 0.08        | 1.06 ± 0.08        | 1.14 ± 0.09        |
| Serine                        | <b>1.56 ± 0.03</b> | 1.19 ± 0.10        | 1.40 ± 0.03        | 1.03 ± 0.06        | <b>1.23 ± 0.03</b> | <b>1.22 ± 0.04</b> |
| Threonine                     | <b>2.29 ± 0.06</b> | 1.92 ± 0.30        | <b>2.76 ± 0.10</b> | <b>2.14 ± 0.04</b> | 1.41 ± 0.06        | 1.07 ± 0.11        |
| Tryptophan                    | 0.74 ± 0.58        | 1.71 ± 0.25        | 0.96 ± 0.22        | 0.78 ± 0.21        | 1.35 ± 0.20        | 1.10 ± 0.09        |
| Tyramine                      | 0.69 ± 0.08        | <b>0.25 ± 0.12</b> | 0.98 ± 0.05        | 0.72 ± 0.08        | 0.90 ± 0.06        | 0.93 ± 0.05        |
| Tyrosine                      | 1.15 ± 0.03        | 0.97 ± 0.06        | <b>1.45 ± 0.08</b> | 0.87 ± 0.07        | 0.92 ± 0.06        | 0.84 ± 0.07        |
| Valine                        | <b>2.69 ± 0.04</b> | <b>1.47 ± 0.07</b> | <b>1.62 ± 0.04</b> | 1.21 ± 0.03        | <b>1.17 ± 0.04</b> | 1.01 ± 0.07        |
| β Alanine                     | <b>2.67 ± 0.10</b> | 1.10 ± 0.10        | <b>2.09 ± 0.02</b> | 1.54 ± 0.06        | <b>1.53 ± 0.09</b> | <b>1.49 ± 0.06</b> |

| <b>Organic acids</b>               |                    |                    |                    |                    |                    |                    |
|------------------------------------|--------------------|--------------------|--------------------|--------------------|--------------------|--------------------|
| alpha-Ketoglutarate                | 0.65 ± 0.27        | 0.50 ± 0.31        | 0.96 ± 0.07        | <b>0.60 ± 0.07</b> | 1.17 ± 0.06        | 1.57 ± 0.08        |
| Citrate                            | 0.77 ± 0.08        | 0.96 ± 0.32        | 1.51 ± 0.16        | 1.07 ± 0.11        | <b>2.07 ± 0.15</b> | 1.36 ± 0.05        |
| Fumarate                           | <b>0.61 ± 0.05</b> | <b>0.51 ± 0.05</b> | 1.42 ± 0.11        | 1.21 ± 0.12        | 1.37 ± 0.14        | 1.21 ± 0.19        |
| Glucarate                          | 0.51 ± 0.07        | 1.00 ± 0.24        | 1.07 ± 0.10        | 0.67 ± 0.32        | 1.57 ± 0.08        | 1.09 ± 0.07        |
| Gluconic acid                      | 0.73 ± 0.17        | 0.64 ± 0.23        | <b>5.90 ± 0.25</b> | 0.66 ± 0.33        | 2.36 ± 0.28        | <b>2.51 ± 0.06</b> |
| Glycerate                          | <b>0.78 ± 0.07</b> | 0.87 ± 0.12        | 1.01 ± 0.08        | <b>0.61 ± 0.07</b> | 0.99 ± 0.11        | 0.90 ± 0.10        |
| Glycolate                          | 1.12 ± 0.13        | 1.06 ± 0.19        | 0.93 ± 0.21        | 0.88 ± 0.11        | 1.09 ± 0.19        | 1.41 ± 0.16        |
| Malate                             | <b>0.53 ± 0.03</b> | <b>0.46 ± 0.08</b> | 0.87 ± 0.08        | <b>0.58 ± 0.11</b> | 0.82 ± 0.08        | 0.93 ± 0.14        |
| Oxalate                            | 0.71 ± 0.12        | 0.91 ± 0.06        | 1.13 ± 0.10        | 0.92 ± 0.07        | 1.02 ± 0.08        | 0.85 ± 0.08        |
| Pipecolate                         | <b>2.34 ± 0.13</b> | <b>1.86 ± 0.09</b> | 1.95 ± 0.28        | <b>2.32 ± 0.19</b> | <b>1.67 ± 0.14</b> | <b>1.83 ± 0.10</b> |
| Quinate                            | 0.55 ± 0.14        | 0.70 ± 0.17        | 1.22 ± 0.30        | <b>0.46 ± 0.14</b> | 0.55 ± 0.14        | 0.60 ± 0.01        |
| Shikimate                          | 0.63 ± 0.31        | 0.54 ± 0.50        | 3.77 ± 0.66        | <b>0.10 ± 0.15</b> | 0.87 ± 0.22        | <b>3.88 ± 0.27</b> |
| Succinate                          | <b>0.78 ± 0.03</b> | 0.80 ± 0.11        | 1.10 ± 0.08        | 0.79 ± 0.13        | <b>1.29 ± 0.07</b> | 0.94 ± 0.11        |
| Threonate                          | 0.86 ± 0.07        | 0.91 ± 0.13        | 1.50 ± 0.07        | 1.13 ± 0.07        | 1.26 ± 0.14        | 0.89 ± 0.14        |
| <b>Fatty Acids</b>                 |                    |                    |                    |                    |                    |                    |
| Palmitic Acid (Hexadecanoate)      | 0.91 ± 0.04        | <b>1.51 ± 0.06</b> | 1.28 ± 0.11        | 0.65 ± 0.10        | 1.21 ± 0.11        | 1.27 ± 0.14        |
| Adipic Acid (Hexanedioic acid)     | 1.20 ± 0.10        | 0.85 ± 0.10        | 1.37 ± 0.09        | 1.11 ± 0.06        | <b>1.77 ± 0.05</b> | 1.04 ± 0.04        |
| Stearic Acid (Octadecanoate)       | 0.87 ± 0.06        | 1.40 ± 0.10        | 1.38 ± 0.15        | 0.88 ± 0.15        | 1.70 ± 0.26        | 1.62 ± 0.18        |
| Linoleic acid                      | 1.13 ± 0.19        | 0.81 ± 0.15        | 1.37 ± 0.26        | 0.82 ± 0.17        | 0.89 ± 0.13        | 1.33 ± 0.33        |
| Octadecanol                        | 0.94 ± 0.14        | <b>1.69 ± 0.09</b> | 1.41 ± 0.30        | 1.08 ± 0.09        | 1.62 ± 0.25        | 1.38 ± 0.13        |
| Oleic acid                         | 0.72 ± 0.08        | 0.70 ± 0.17        | 1.33 ± 0.28        | 0.73 ± 0.17        | 0.99 ± 0.14        | 1.08 ± 0.39        |
| <b>Sugars and Sugar Phosphates</b> |                    |                    |                    |                    |                    |                    |
| Erythrose                          | 1.27 ± 0.23        | 1.11 ± 0.28        | 0.95 ± 0.35        | 0.52 ± 0.33        | <b>2.24 ± 0.21</b> | 0.57 ± 0.07        |
| Fructose                           | 0.61 ± 0.24        | 0.55 ± 0.20        | 1.03 ± 0.12        | 0.45 ± 0.16        | 0.96 ± 0.21        | 1.04 ± 0.18        |
| Fructose_6_Phosphate               | 0.47 ± 0.08        | <b>0.28 ± 0.08</b> | 1.24 ± 0.12        | 1.00 ± 0.11        | 1.16 ± 0.21        | 0.75 ± 0.06        |
| Galactinol                         | 1.11 ± 0.16        | 0.81 ± 0.14        | <b>2.06 ± 0.18</b> | <b>1.69 ± 0.08</b> | <b>1.36 ± 0.07</b> | 1.17 ± 0.14        |
| Galactonate                        | 0.66 ± 0.28        | 0.62 ± 0.43        | 1.31 ± 0.21        | 0.82 ± 0.23        | 0.97 ± 0.10        | 1.41 ± 0.10        |
| Gluconate-6-phosphate              | 1.45 ± 0.26        | 1.03 ± 0.17        | 1.02 ± 0.18        | 1.42 ± 0.17        | 1.44 ± 0.26        | 1.51 ± 0.21        |
| Glucose                            | 0.56 ± 0.27        | <b>0.51 ± 0.15</b> | 1.12 ± 0.16        | 0.76 ± 0.13        | 1.01 ± 0.19        | 1.16 ± 0.18        |
| Glucose-6-phosphate                | 0.41 ± 0.03        | <b>0.26 ± 0.09</b> | 1.00 ± 0.09        | 0.84 ± 0.09        | 1.09 ± 0.16        | 1.14 ± 0.27        |
| Glycerol                           | <b>0.32 ± 0.05</b> | 1.34 ± 0.23        | 0.92 ± 0.30        | <b>0.27 ± 0.10</b> | 0.86 ± 0.13        | 1.55 ± 0.15        |
| Glycerol-3-phosphate               | 1.29 ± 0.09        | 1.09 ± 0.18        | 1.72 ± 0.33        | 1.59 ± 0.21        | 1.46 ± 0.25        | 0.94 ± 0.05        |

|                        |                    |                    |                    |                    |                    |                    |
|------------------------|--------------------|--------------------|--------------------|--------------------|--------------------|--------------------|
| Glycerophosphoglycerol | 0.54 ± 0.06        | <b>0.57 ± 0.05</b> | 0.74 ± 0.09        | 1.67 ± 0.22        | <b>2.49 ± 0.35</b> | 2.36 ± 0.30        |
| Inositol               | 1.00 ± 0.12        | 0.90 ± 0.12        | 1.22 ± 0.18        | 1.09 ± 0.15        | 0.93 ± 0.15        | 1.25 ± 0.16        |
| Inositol-1-phosphate   | 0.77 ± 0.07        | 0.85 ± 0.21        | 0.77 ± 0.05        | 1.09 ± 0.16        | 0.94 ± 0.19        | <b>0.83 ± 0.04</b> |
| Maltose                | 1.49 ± 0.09        | 0.96 ± 0.22        | <b>1.87 ± 0.05</b> | 1.14 ± 0.16        | 0.85 ± 0.03        | 0.99 ± 0.03        |
| Raffinose              | <b>0.43 ± 0.24</b> | <b>0.30 ± 0.17</b> | 1.48 ± 0.15        | 0.94 ± 0.14        | <b>1.83 ± 0.10</b> | <b>1.60 ± 0.11</b> |
| Ribonate               | 0.70 ± 0.34        | 6.74 ± 0.55        | 0.78 ± 0.26        | 0.86 ± 0.18        | 1.35 ± 0.24        | 1.38 ± 0.33        |
| Sucrose                | 1.56 ± 0.14        | 0.78 ± 0.11        | <b>1.74 ± 0.13</b> | 1.24 ± 0.12        | 1.95 ± 0.24        | 1.53 ± 0.15        |
| Trehalose              | 0.58 ± 0.08        | 0.96 ± 0.23        | 1.09 ± 0.10        | 0.97 ± 0.13        | 0.93 ± 0.10        | 1.45 ± 0.29        |
| Xylose                 | 0.73 ± 0.33        | 1.38 ± 0.18        | 2.21 ± 0.35        | 0.89 ± 0.24        | 0.97 ± 0.35        | <b>3.19 ± 0.09</b> |
| <b>Other compounds</b> |                    |                    |                    |                    |                    |                    |
| Adenosine              | 1.37 ± 0.14        | 1.14 ± 0.29        | 0.87 ± 0.22        | 0.86 ± 0.11        | 0.86 ± 0.30        | 0.63 ± 0.18        |
| Campersterol           | <b>1.70 ± 0.09</b> | 1.03 ± 0.05        | 0.83 ± 0.16        | 1.08 ± 0.10        | 1.20 ± 0.13        | 1.90 ± 0.38        |
| Ethanolamine           | 0.98 ± 0.03        | <b>0.69 ± 0.12</b> | 1.01 ± 0.15        | 0.93 ± 0.04        | 1.22 ± 0.13        | 1.33 ± 0.16        |
| Fucosterol             | 1.00 ± 0.11        | <b>0.51 ± 0.12</b> | 0.52 ± 0.21        | 0.86 ± 0.13        | 1.30 ± 0.12        | 0.92 ± 0.08        |
| Indole-3-acetate (IAA) | 2.21 ± 0.23        | 0.65 ± 0.16        | 2.13 ± 0.39        | 0.91 ± 0.29        | 1.52 ± 0.26        | 0.88 ± 0.14        |
| Monomethylphosphate    | 0.67 ± 0.19        | <b>1.67 ± 0.08</b> | 1.31 ± 0.24        | 1.24 ± 0.11        | 1.28 ± 0.14        | 1.28 ± 0.16        |
| Phosphate              | 0.87 ± 0.06        | 1.22 ± 0.15        | 1.13 ± 0.18        | 1.21 ± 0.10        | 1.05 ± 0.06        | <b>2.15 ± 0.19</b> |
| Uracil                 | 1.23 ± 0.08        | <b>0.37 ± 0.12</b> | 1.16 ± 0.07        | <b>0.61 ± 0.12</b> | 1.44 ± 0.13        | <b>0.76 ± 0.05</b> |
| <b>Unknowns</b>        |                    |                    |                    |                    |                    |                    |
| Un_11.54_417           | 0.85 ± 0.04        | 1.35 ± 0.09        | 1.32 ± 0.14        | 0.95 ± 0.12        | 1.02 ± 0.14        | 1.18 ± 0.19        |
| Un_12.91_273           | 0.83 ± 0.09        | <b>0.48 ± 0.05</b> | 1.31 ± 0.08        | 0.73 ± 0.09        | 1.04 ± 0.15        | 1.08 ± 0.22        |
| Un_13.96_284           | 0.91 ± 0.06        | <b>1.86 ± 0.21</b> | 0.93 ± 0.14        | <b>0.65 ± 0.07</b> | 1.28 ± 0.12        | 1.39 ± 0.13        |
| Un_14.37_158           | 0.85 ± 0.09        | <b>0.24 ± 0.15</b> | 1.22 ± 0.11        | 0.83 ± 0.11        | 1.18 ± 0.12        | 0.89 ± 0.13        |
| Un_14.87_191           | 1.47 ± 0.09        | 1.46 ± 0.08        | 1.70 ± 0.40        | 0.94 ± 0.15        | 1.20 ± 0.18        | 1.20 ± 0.12        |
| Un_15.01_115           | <b>3.66 ± 0.19</b> | 0.70 ± 0.13        | <b>2.75 ± 0.21</b> | 1.00 ± 0.15        | <b>2.39 ± 0.05</b> | 1.15 ± 0.11        |
| Un_15.07_261           | <b>2.67 ± 0.15</b> | 1.31 ± 0.24        | <b>2.63 ± 0.17</b> | 1.10 ± 0.14        | 2.92 ± 0.34        | 0.98 ± 0.08        |
| Un_16.77_591           | <b>0.76 ± 0.05</b> | 0.84 ± 0.07        | 1.12 ± 0.10        | 1.02 ± 0.11        | <b>1.45 ± 0.05</b> | <b>1.60 ± 0.10</b> |
| Un_17.26_102           | 0.63 ± 0.15        | <b>0.38 ± 0.26</b> | 1.04 ± 0.41        | 0.74 ± 0.12        | 0.98 ± 0.34        | 0.59 ± 0.11        |
| Un_18.1_345            | 1.51 ± 0.17        | 0.77 ± 0.20        | 1.20 ± 0.07        | 0.93 ± 0.08        | 0.80 ± 0.15        | 1.05 ± 0.10        |
| Un_18.11_116           | 0.76 ± 0.16        | <b>0.22 ± 0.21</b> | 1.68 ± 0.30        | 1.04 ± 0.09        | 0.96 ± 0.13        | 0.79 ± 0.08        |
| Un_18.4_242            | 1.19 ± 0.08        | <b>1.66 ± 0.10</b> | 1.08 ± 0.10        | 0.82 ± 0.14        | 1.93 ± 0.29        | 2.13 ± 0.33        |
| Un_19.41_156           | 1.83 ± 0.13        | 0.73 ± 0.13        | 1.71 ± 0.18        | 0.83 ± 0.10        | 1.51 ± 0.19        | 1.01 ± 0.09        |
| Un_22.25_217           | 1.01 ± 0.12        | 0.85 ± 0.21        | 1.39 ± 0.16        | 0.39 ± 0.18        | 1.31 ± 0.22        | 1.57 ± 0.24        |

|              |             |                    |                    |             |                    |                    |
|--------------|-------------|--------------------|--------------------|-------------|--------------------|--------------------|
| Un_25.61_379 | 1.08 ± 0.11 | <b>0.48 ± 0.12</b> | 1.00 ± 0.09        | 0.72 ± 0.31 | 0.93 ± 0.31        | <b>1.63 ± 0.15</b> |
| Un_26.96_433 | 1.04 ± 0.16 | <b>0.61 ± 0.15</b> | 1.08 ± 0.08        | 0.79 ± 0.26 | 0.71 ± 0.21        | 0.62 ± 0.24        |
| Un_27.2_217  | 0.79 ± 0.06 | 1.20 ± 0.15        | 0.89 ± 0.05        | 1.35 ± 0.14 | 1.09 ± 0.06        | 1.24 ± 0.10        |
| Un_28.39_446 | 1.10 ± 0.12 | <b>0.41 ± 0.13</b> | 1.14 ± 0.09        | 0.65 ± 0.34 | 0.66 ± 0.25        | 0.87 ± 0.25        |
| Un_28.68_446 | 1.04 ± 0.11 | 0.45 ± 0.11        | 1.20 ± 0.05        | 1.04 ± 0.32 | 0.75 ± 0.23        | 0.92 ± 0.20        |
| Un_30.54_217 | 0.54 ± 0.05 | 0.74 ± 0.12        | <b>0.51 ± 0.05</b> | 0.78 ± 0.11 | 0.97 ± 0.09        | 1.45 ± 0.27        |
| Un_30.72_217 | 0.54 ± 0.05 | 0.74 ± 0.12        | <b>0.48 ± 0.05</b> | 0.73 ± 0.11 | 0.98 ± 0.10        | 1.46 ± 0.27        |
| Un_33.11_433 | 0.72 ± 0.08 | 1.04 ± 0.25        | 1.22 ± 0.10        | 1.32 ± 0.11 | <b>1.43 ± 0.07</b> | 1.80 ± 0.30        |

Data represents mean of 4-5 representatives of 10-pooled samples +/- s.e. Values that are highlighted in *green* (and bold) have a *t*-Test value  $P < 0.05$  / (number of metabolites) while those with cyan (and bold) highlight are between this  $P$  value and 0.05 (i.e. below 0.05, but not below the Bonferroni-corrected  $P$  value).
